# Supplementary material for: Spectroscopic evidence for intermediate species formed during aniline polymerization and polyaniline degradation
Source: Royal Society of Chemistry journal article supplement (doi:10.1039/c002920c), 2010-01-01
Supplement: c002920c.pdf [file c002920c.pdf]

## ELECTRONIC SUPPORTING INFORMATION

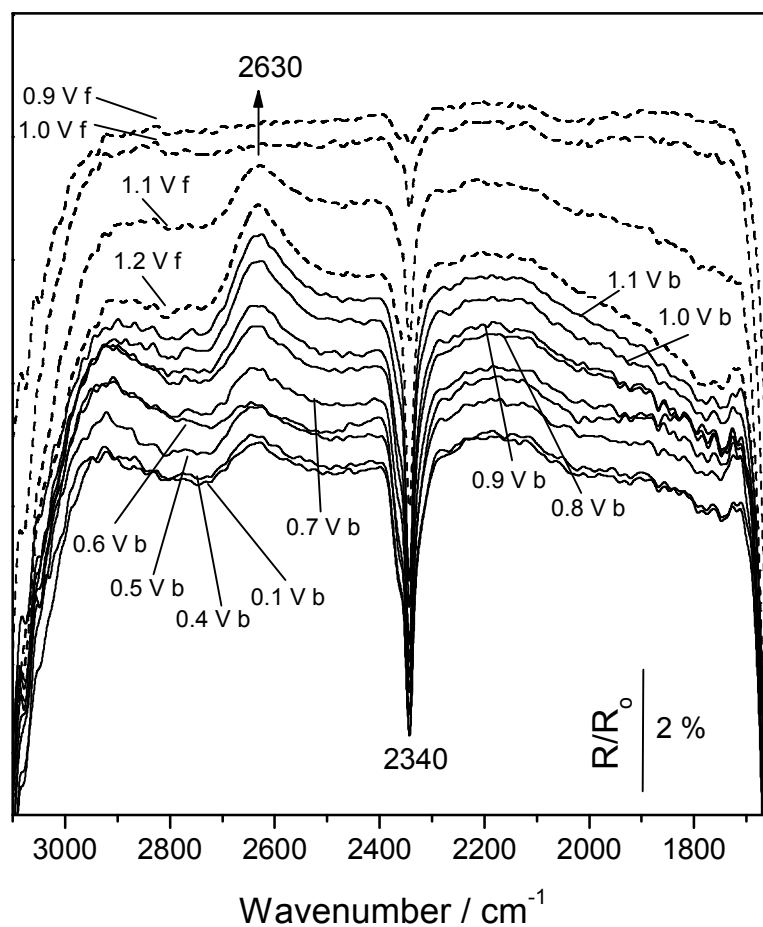

**Figure S1.** In-situ FTIR spectra acquired during oxidation of aniline (10 mM/0.1 M HClO<sub>4</sub>) on polycrystalline Pt. Sample potentials as indicated in the figure (f = forward, b = backward step direction). Reference potential = 0.10 V<sub>RHE</sub>. Spectra taken with p-polarized light, 128 scans at 8 cm<sup>-1</sup> resolution. Same conditions as those described for Figure 1B.

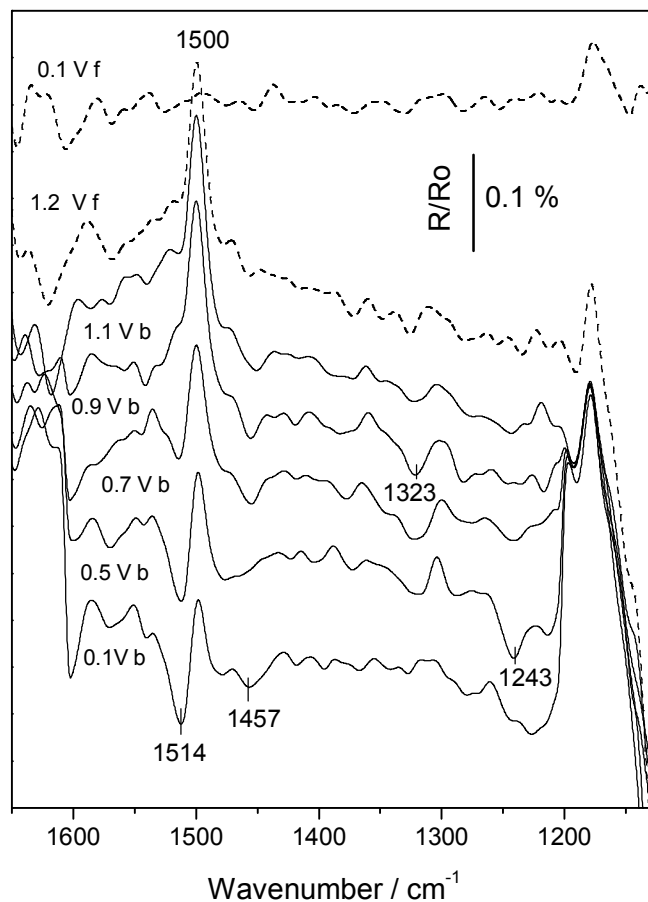

**Figure S2.** In-situ FTIR spectra taken during oxidation of aniline (10 mM/0.1 M  $\text{HClO}_4$ ) on polycrystalline Pt (reference spectrum taken at 0.1  $V_{\text{RHE}}$ ). Spectra taken with s-polarized light, 256 scans at  $8 \text{ cm}^{-1}$  resolution. Sample potentials as indicated in the figure (f = forward, b = backward step direction).

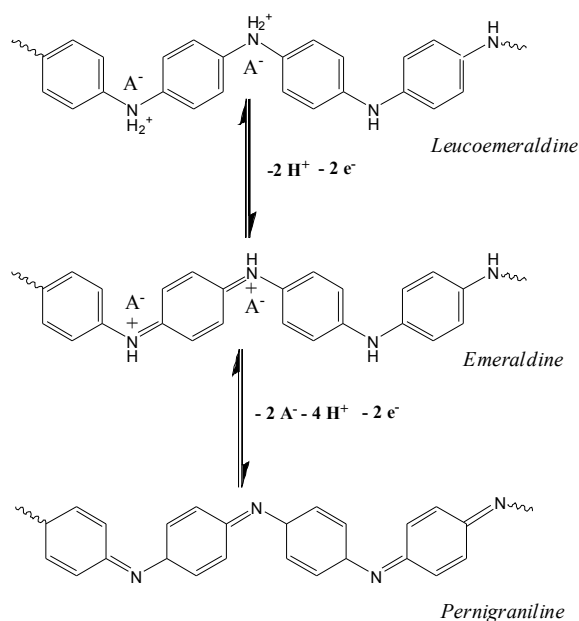

**Scheme S1.** Changes of chemical structures during oxidation/reduction of PANI in acid media.  $\text{A}^-$  are the anions present in the electrolyte ( $\text{ClO}_4^-$  in this work).

**Table 1.** Assignment of vibrational bands observed during ANI oxidation (Figure 1B). The wavenumber values calculated by DFT to the vibrations described in the table are shown between parentheses.<sup>⊗</sup>

| Wavenumber/<br>$\text{cm}^{-1}$ | Sense | Vibration                          | Species                             |
|---------------------------------|-------|------------------------------------|-------------------------------------|
| 1551 (1582)                     | +     | C=C str.                           | ANI <sup>a</sup>                    |
| 1536 (1535)                     | +     | NH <sub>2</sub> plane bending      | ANI <sup>a</sup>                    |
| 1500                            | +     | C=C aromat. str.                   | See text                            |
| 1514 (1536)                     | -     | C=C aromat. str.                   | 4ADA <sup>b</sup>                   |
| 1475 (1483)                     | -     | Bending secondary N-H              | 4ADA <sup>a</sup>                   |
| 1457 (1462)                     | -     | C=C arom. str.                     | 4ADA <sup>c</sup> & BZ <sup>c</sup> |
| 1323 (1341)                     | -     | C-N str.ar.sec.amines <sup>d</sup> | 4ADA <sup>b</sup>                   |
| 1293 (1335)                     | +     | C-N symmetric str.                 | ANI <sup>a</sup>                    |
| 1243 (1240)                     | -     | C-N str                            | 4ADA <sup>c</sup> & BZ <sup>c</sup> |

<sup>a</sup> E. Pretsch, P. Bühlmann, C. Affolder, Structure Determination of Organic Compounds, Springer, Berlin, 2000.  
<sup>b</sup> P. Sett, A.K. De, S. Chattopadhyay, P.K. Mallick, Chemical Physics, 2002, 276, 211-224.  
<sup>c</sup> S. Akyüz, T. Akyüz, N.M. Ozer, J. Mol. Struct., 2001, 565, 493-496.  
<sup>d</sup> R. Buvanewari, A. Gopalan, T. Vasudevan, H-L. Wang,; T-C. Wen, Thin Solid Films, 2004, 458, 77-85.

<sup>⊗</sup> Note that in ref. c the spectrum of adsorbed benzidine is described.

**Table 2.** Assignment of vibrational bands of the isolated adsorbate produced during ANI oxidation (Figure 3B). The wavenumber values calculated by DFT to the vibrations described in the table are shown between parentheses.

| Wavenumber/<br>cm <sup>-1</sup> | Sense | Vibration                                          | Species |
|---------------------------------|-------|----------------------------------------------------|---------|
| 1582 (1590)                     | -     | C=N str. <sup>a</sup>                              | 4ADAOx  |
| 1511(1536)                      | +     | C=C arom. str. <sup>b</sup>                        | 4ADA    |
| 1417 (1436)                     | -     | C-C str. <sup>c</sup>                              | 4ADAOx  |
| 1367 (1382)                     | -     | C-N stretching in a quinonimine ring. <sup>d</sup> | 4ADAOx  |
| 1313 (1309)                     | +     | C-N stretching <sup>b</sup>                        | 4ADA    |
| 1243 (1245)                     | -     | C-N str. in C-N=C <sup>e</sup>                     | 4ADAOx  |
| 1218 (1221)                     | -     | -NH bend <sup>e</sup>                              | 4ADAOx  |

<sup>a</sup> S. Quillard, G. Louarn, J.P. Buisson, M. Boyer, S. Lefrant, M. Lapkowski, A. Pron, Synth. Met., 1997, 84, 805.  
<sup>b</sup> P. Sett, A.K. De, S. Chattopadhyay, P.K. Mallick, Chemical Physics, 2002, 276, 211-224.  
<sup>c</sup> E. Pretsch, P. Bühlmann, C. Affolder, Structure Determination of Organic Compounds, Springer, Berlin, 2000.  
<sup>d</sup> L. Brožová, P. Holler, J. Kovářová, J. Stejskal, M. Trchová, Polymer Degradation and Stability, 2008, 93, 592-600.  
<sup>e</sup> S. Quillard, G. Louarn, S. Lefrant, A.G. MacDiarmid, Phys Rev B, 1994, 50,12496-12508

**Table 3.** Assignment of vibrational bands observed during 0.05 and 0.1 M PANI oxidation (Figures 4 and 5). The wavenumber values calculated by DFT to the vibrations described in the text are shown between parentheses.

| Wavenumber/<br>cm <sup>-1</sup> | Sense            | Vibration <sup>a</sup> | Species <sup>&amp;</sup>                                |              |
|---------------------------------|------------------|------------------------|---------------------------------------------------------|--------------|
| P005 <sup>#</sup>               | P01 <sup>#</sup> |                        |                                                         |              |
| 1581<br>(1588)                  | 1581             | -                      | N=Q=N* str. <sup>b</sup>                                | EM           |
| 1512<br>(1546)                  | 1512             | +                      | C=C arom. str.<br>N-B-N                                 | LE           |
| 1475<br>(1462)                  | 1487             | -                      | C=C arom. str.<br>N-B-N                                 | PN           |
| 1450<br>(1422)                  | -                | -                      | C=C arom. str.<br>N-B-N                                 | PN           |
| 1423<br>(1433)                  | -                | +                      | C-N str.                                                | LE           |
| 1377<br>(1381)                  | 1360             | -                      | C-N str. <sup>c</sup>                                   | EM and<br>PN |
| 1342<br>(1309)                  | -                | -                      | C-C str.,<br>N-H o.o.p. bend                            | EM           |
| 1288<br>(1277)                  |                  | +                      | C-N str. sec. aromatic<br>amine <sup>d</sup>            | LE           |
| 1238                            | 1268             | -                      | C-N stretch, C-C-C ring i.p.<br>def.                    | EM           |
| 1218<br>(1213)                  | -                | +                      | -NH <sub>2</sub> <sup>+</sup> bend.                     | LE           |
| 1157<br>(1154)                  | 1189             | -                      | N=Q=N <sup>e</sup><br>C-H in plane bending <sup>e</sup> | EM           |

<sup>\*</sup> Q = quinonoid unit, B= benzenoid unit,  
<sup>&</sup> LE = leucoemeraldine unit, EM = emeraldine unit, PN = pernigraniline unit  
<sup>#</sup> P005= PANI produced in 0.05 M ANI, P01 = PANI produced in 0.1 M ANI  
<sup>a</sup> E.P. Pretsch, P. Bühlmann, C. Affolder, Structure Determination of Organic Compounds, Springer, Berlin, 2000.  
<sup>b</sup> C. Yang, C. Chen, Y. Zeng, Spectrochimica Acta Part A: Molecular and Biomolecular Spectroscopy, 2007, 66,37-41.  
<sup>c</sup> L. Brožová, P. Holler, J. Kovářová, J. Stejskal, M. Trchová, Polymer Degradation and Stability, 2008, 93, 592-600.  
<sup>d</sup> S. Kazim, V. Ali, M. Zulfeqar, M. Mazharul Haq, M. Husai, Current Applied Physics, 2007, 7, 68-75.  
<sup>e</sup> R. Singh, V. Arora, R.P. Tandon, S. Chandra, N. Kumar, A. Mansingh, Polymer, 1997, 38, 4897.

**Table 4.** Assignment of vibrational bands observed after degradation of PANI and its comparison with hydroquinone. (Figure 6). The wavenumber values calculated by DFT to the vibrations described in the table are shown between parentheses.

| Wavenumber/ cm <sup>-1</sup> | Sense | Vibration <sup>a</sup> | Species <sup>k</sup>   |
|------------------------------|-------|------------------------|------------------------|
| 2800 <sup>a</sup> (2795)     | -     |                        | <i>IN</i>              |
| 2622 <sup>a</sup> (2618)     | +     |                        | <i>IN</i>              |
| 2340 <sup>a</sup> (2345)     | -     | asym. str.             | <i>CO</i> <sub>2</sub> |
| 1656 <sup>b</sup> (1654)     | -     | C=O stretching         | <i>BQ</i>              |
| 1515 <sup>c</sup> (1518)     | +     | C=C ar. str.           | <i>HQ</i>              |
| 1471 (1426)                  | +     |                        | <i>HQ</i>              |
| 1315 (1309)                  | -     |                        | <i>BQ</i>              |
| 1242 <sup>d</sup> (1237)     | +     | C-O-H sym. str.        | <i>HQ</i>              |
| 1223 <sup>d</sup> (1225)     | +     | C-O-H asym. str.       | <i>HQ</i>              |

<sup>k</sup> *HQ* = hydroquinone, *BQ* = benzoquinone, *IN* = indophenol.  
<sup>a</sup> E.P. Pretsch, P. Bühlmann, C. Affolder, Structure Determination of Organic Compounds, Springer, Berlin, 2000.  
<sup>b</sup> D. Lin-Vien, N.B. Colthup, W.G. Fateley, J.G. Grasselli, The Handbook of Infrared and Raman Characteristic Frequencies of Organic Molecules, Academic Press, San Diego, USA, 1991.  
<sup>c</sup> G. Socrates, Infrared Characteristic Group Frequencies, Wiley, New York, 1980.  
<sup>d</sup> L.J. Bellamy, Advances in infrared group frequencies, Halsted Press, London, 1975.

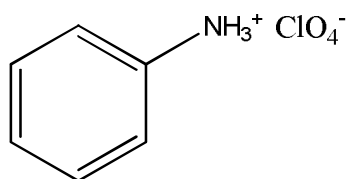

**ANI = aniline protonated**

----- GAMESS Interface -----

GAMESS Job: Predict IR/Raman Spectrum B3LYP/6-31G

IR Spectrum Species:

Transmittance (%)    Wavenumbers

| -----  | -----     |
|--------|-----------|
| 100.00 | 5.9300    |
| 100.00 | 9.4700    |
| 99.96  | 13.1000   |
| 99.11  | 30.7300   |
| 99.87  | 33.7300   |
| 99.13  | 43.9400   |
| 99.87  | 51.7800   |
| 99.88  | 69.4700   |
| 99.44  | 185.5000  |
| 98.25  | 260.8600  |
| 99.22  | 382.1000  |
| 100.00 | 424.8000  |
| 99.78  | 445.4900  |
| 99.44  | 471.8100  |
| 98.87  | 571.8200  |
| 99.93  | 668.5100  |
| 99.34  | 718.8000  |
| 97.82  | 782.8700  |
| 99.74  | 859.3600  |
| 99.96  | 883.6400  |
| 99.99  | 962.7500  |
| 99.09  | 1018.7400 |
| 99.99  | 1022.7400 |
| 99.91  | 1053.2100 |
| 100.00 | 1060.9200 |
| 99.84  | 1079.4800 |
| 99.71  | 1136.3300 |
| 99.06  | 1146.2000 |
| 99.97  | 1226.4600 |
| 99.92  | 1231.9200 |
| 99.99  | 1335.4000 |
| 99.97  | 1394.0000 |
| 99.78  | 1404.9900 |
| 99.86  | 1535.0600 |
| 90.06  | 1582.6700 |
| 84.25  | 1605.5800 |
| 96.28  | 1661.2300 |
| 98.39  | 1662.3200 |
| 99.77  | 1691.4700 |
| 99.96  | 1702.6900 |

|       |           |
|-------|-----------|
| 0.00  | 2722.5700 |
| 99.83 | 3173.2600 |
| 99.92 | 3180.2200 |
| 99.71 | 3189.2900 |
| 99.55 | 3201.3000 |
| 99.62 | 3214.7600 |
| 98.71 | 3460.4800 |
| 97.29 | 3547.4100 |

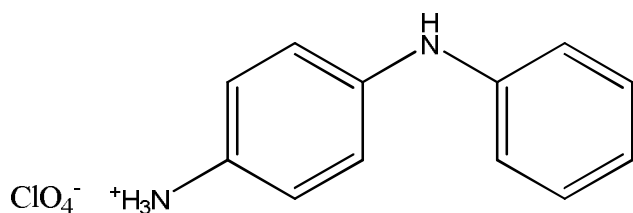

**4ADA = 4-aminodiphenylamine monoprotonated**

GAMESS Job: Predict IR/Raman Spectrum B3LYP/6-31G

IR Spectrum Species:

Transmittance (%)    Wavenumbers

| ----- | -----     |
|-------|-----------|
| 89.79 | 4.9000    |
| 98.16 | 7.3400    |
| 88.30 | 11.4100   |
| 98.87 | 17.3400   |
| 99.76 | 20.3000   |
| 99.16 | 30.0700   |
| 98.71 | 33.3900   |
| 97.75 | 39.7200   |
| 99.38 | 47.2700   |
| 92.26 | 67.3000   |
| 86.11 | 92.2400   |
| 94.54 | 121.5600  |
| 97.54 | 195.4700  |
| 99.59 | 246.4000  |
| 98.18 | 269.0100  |
| 85.75 | 316.9200  |
| 95.63 | 329.2600  |
| 96.22 | 354.5700  |
| 96.39 | 356.8000  |
| 97.49 | 362.8000  |
| 69.58 | 444.8600  |
| 40.79 | 499.6400  |
| 86.78 | 518.0200  |
| 92.80 | 569.2400  |
| 39.58 | 571.2400  |
| 96.56 | 627.5500  |
| 93.21 | 630.3500  |
| 76.27 | 643.8400  |
| 98.35 | 659.0200  |
| 86.94 | 682.0400  |
| 0.00  | 773.9800  |
| 82.24 | 803.5800  |
| 98.90 | 837.6700  |
| 97.45 | 839.5800  |
| 21.82 | 867.5300  |
| 84.75 | 886.5000  |
| 85.98 | 926.8200  |
| 99.97 | 970.6500  |
| 94.74 | 975.9100  |
| 96.81 | 979.8100  |
| 92.18 | 993.4500  |
| 96.25 | 1013.0800 |



|       |           |
|-------|-----------|
| 77.32 | 1046.2000 |
| 47.22 | 1050.9700 |
| 26.63 | 1065.2400 |
| 97.30 | 1097.8400 |
| 2.22  | 1107.1800 |
| 31.63 | 1123.0600 |
| 97.49 | 1153.4800 |
| 75.13 | 1158.9600 |
| 81.21 | 1163.4800 |
| 93.11 | 1181.5600 |
| 38.52 | 1216.8200 |
| 27.04 | 1228.8700 |
| 12.23 | 1240.0800 |
| 96.29 | 1282.6400 |
| 58.63 | 1309.5200 |
| 61.79 | 1341.4600 |
| 75.57 | 1357.7200 |
| 22.40 | 1385.0100 |
| 94.86 | 1388.4900 |
| 94.96 | 1462.2400 |
| 25.72 | 1536.6300 |
| 36.35 | 1550.2800 |
| 88.80 | 1550.8500 |
| 73.41 | 1586.2800 |
| 63.03 | 1612.3100 |
| 73.46 | 1686.2400 |
| 94.03 | 1759.9300 |
| 96.49 | 1774.1800 |
| 94.35 | 1783.6700 |
| 97.93 | 1790.0600 |
| 98.69 | 2938.3400 |
| 95.80 | 3022.6300 |
| 97.78 | 3036.3100 |
| 99.37 | 3051.1900 |
| 97.98 | 3052.0900 |
| 99.68 | 3060.0000 |
| 95.72 | 3066.9000 |
| 96.33 | 3072.0800 |
| 98.44 | 3080.6200 |
| 98.59 | 3374.0800 |
| 69.32 | 3417.1900 |
| 91.41 | 3540.0000 |

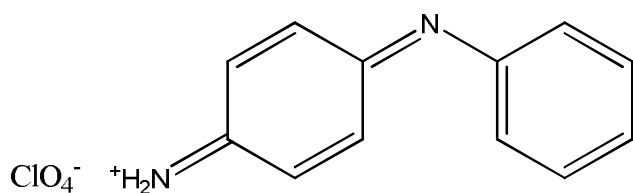

**4ADAOx = 4-aminodiphenylamine oxidized monoprotonated**

GAMESS Job: Predict IR/Raman Spectrum B3LYP/6-31G

IR Spectrum Species:

Transmittance (%) Wavenumbers

| Transmittance (%) | Wavenumbers |
|-------------------|-------------|
| 100.00            | 3.7300      |
| 99.97             | 9.5000      |
| 99.04             | 11.3000     |
| 100.00            | 12.8200     |
| 99.01             | 14.2700     |
| 99.97             | 16.7200     |
| 99.91             | 17.7300     |
| 98.04             | 20.4400     |
| 99.22             | 24.1000     |
| 98.28             | 40.4800     |
| 99.75             | 77.8800     |
| 99.45             | 99.6400     |
| 99.92             | 202.7800    |
| 98.52             | 214.4500    |
| 99.17             | 227.7800    |
| 99.08             | 332.9200    |
| 99.91             | 353.6300    |
| 99.95             | 358.6700    |
| 89.27             | 415.0800    |
| 74.66             | 443.0900    |
| 81.46             | 462.6200    |
| 56.93             | 468.2600    |
| 96.95             | 525.2200    |
| 92.79             | 532.4500    |
| 48.23             | 584.9700    |
| 99.65             | 598.3700    |
| 99.53             | 627.3200    |
| 88.62             | 627.8300    |
| 84.52             | 668.5100    |
| 99.92             | 711.5800    |
| 95.79             | 771.6500    |
| 68.50             | 774.4600    |
| 83.08             | 817.8200    |
| 100.00            | 844.0400    |
| 99.01             | 857.4300    |
| 99.32             | 879.0900    |
| 0.00              | 886.1000    |
| 95.01             | 937.8700    |
| 94.98             | 951.3200    |
| 99.99             | 974.9900    |
| 99.68             | 992.6800    |
| 71.87             | 993.5800    |

|       |           |
|-------|-----------|
| 99.28 | 1015.2500 |
| 97.01 | 1017.4100 |
| 44.88 | 1051.9900 |
| 42.64 | 1102.2500 |
| 52.20 | 1124.5300 |
| 77.19 | 1133.5000 |
| 99.44 | 1153.1200 |
| 98.78 | 1159.0100 |
| 71.67 | 1165.3300 |
| 91.36 | 1181.3800 |
| 98.41 | 1221.6900 |
| 85.19 | 1245.2000 |
| 99.96 | 1300.2100 |
| 39.81 | 1314.7300 |
| 52.73 | 1382.2200 |
| 95.26 | 1436.2000 |
| 98.89 | 1514.7800 |
| 75.79 | 1540.7900 |
| 72.73 | 1590.6100 |
| 97.01 | 1771.6100 |
| 99.69 | 1788.0700 |
| 99.84 | 1832.8700 |
| 93.80 | 1846.1700 |
| 98.65 | 1862.9400 |
| 99.01 | 1874.1100 |
| 87.86 | 2306.5700 |
| 99.50 | 3006.7800 |
| 97.88 | 3027.1200 |
| 99.74 | 3042.7800 |
| 99.90 | 3043.5400 |
| 98.52 | 3052.0100 |
| 98.37 | 3061.5000 |
| 98.51 | 3062.6400 |
| 98.37 | 3067.7600 |
| 98.84 | 3083.9700 |
| 98.72 | 3470.4000 |

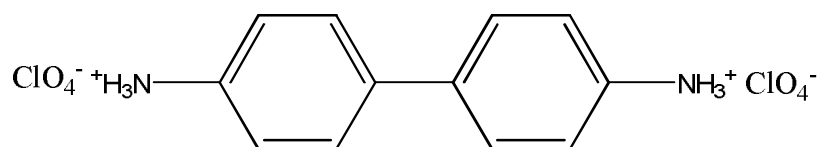

**BZ = Benzidine diprotonated**

GAMESS Job: Predict IR/Raman Spectrum B3LYP/6-31G

IR Spectrum Species:

Transmittance (%)    Wavenumbers

| -----  | -----    |
|--------|----------|
| 98.86  | 6.5200   |
| 100.00 | 7.5100   |
| 99.93  | 9.7100   |
| 99.80  | 13.0600  |
| 98.23  | 23.0300  |
| 98.33  | 26.4200  |
| 98.82  | 32.9400  |
| 99.16  | 35.7400  |
| 99.60  | 37.4400  |
| 99.62  | 39.1400  |
| 97.33  | 49.3400  |
| 99.27  | 55.8400  |
| 98.91  | 73.9400  |
| 99.23  | 148.5300 |
| 99.17  | 168.3300 |
| 97.06  | 193.7100 |
| 99.01  | 226.8200 |
| 96.36  | 256.2800 |
| 99.42  | 279.7200 |
| 96.45  | 288.5600 |
| 99.12  | 351.2100 |
| 99.98  | 358.3500 |
| 98.22  | 364.3600 |
| 99.88  | 387.3900 |
| 85.68  | 456.9300 |
| 85.93  | 466.1200 |
| 87.00  | 533.9800 |
| 96.30  | 542.3500 |
| 77.64  | 547.7200 |
| 80.58  | 561.1600 |
| 59.88  | 574.1100 |
| 44.55  | 618.2100 |
| 79.28  | 623.8300 |
| 88.36  | 638.5100 |
| 99.43  | 649.6600 |
| 98.32  | 675.5900 |
| 98.58  | 702.0000 |
| 98.44  | 713.5100 |
| 98.92  | 844.1000 |
| 99.74  | 847.9600 |
| 46.52  | 854.5800 |
| 99.86  | 867.9900 |
| 88.84  | 883.4800 |
| 99.93  | 958.6800 |
| 99.98  | 976.4400 |

|       |           |
|-------|-----------|
| 99.95 | 979.1800  |
| 99.98 | 986.4100  |
| 98.56 | 1000.2700 |
| 74.93 | 1040.9800 |
| 99.75 | 1053.5000 |
| 91.57 | 1103.4400 |
| 93.08 | 1107.1700 |
| 0.00  | 1120.6000 |
| 86.40 | 1130.0100 |
| 82.63 | 1137.9800 |
| 93.18 | 1160.8200 |
| 94.93 | 1162.6000 |
| 95.53 | 1170.1300 |
| 84.87 | 1175.4700 |
| 97.13 | 1226.3700 |
| 99.42 | 1228.5000 |
| 99.81 | 1262.5200 |
| 99.95 | 1316.1900 |
| 98.05 | 1324.6300 |
| 75.47 | 1362.3400 |
| 99.94 | 1483.3700 |
| 91.40 | 1525.8700 |
| 94.47 | 1550.7400 |
| 84.01 | 1590.3900 |
| 98.44 | 1642.8900 |
| 76.67 | 1650.2500 |
| 99.96 | 1683.2500 |
| 99.90 | 1768.6100 |
| 99.97 | 1776.5600 |
| 99.97 | 1800.3700 |
| 99.99 | 1813.5800 |
| 88.27 | 2181.5000 |
| 93.16 | 2203.0400 |
| 99.50 | 3020.0700 |
| 99.30 | 3032.8400 |
| 99.65 | 3038.5300 |
| 98.80 | 3043.1000 |
| 98.69 | 3053.7900 |
| 99.66 | 3055.5000 |
| 98.51 | 3070.9400 |
| 99.70 | 3071.8300 |
| 96.20 | 3377.3000 |
| 96.16 | 3384.5100 |
| 98.90 | 3510.6700 |
| 98.93 | 3514.7000 |

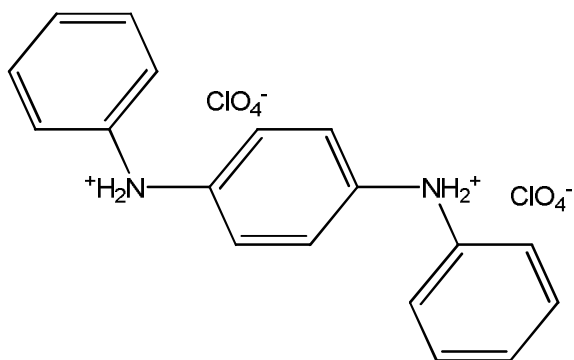

**LE = model unit of polyaniline, leucomeraldine form protonated**

GAMESS Job: Predict IR/Raman Spectrum B3LYP/6-31G

IR Spectrum Species:

-----  
Transmittance (%)    Wavenumbers  
-----

|        |          |
|--------|----------|
| 99.83  | 8.4800   |
| 99.71  | 9.4600   |
| 99.93  | 11.8900  |
| 99.44  | 16.4600  |
| 97.21  | 25.4600  |
| 99.81  | 26.7700  |
| 99.96  | 33.0000  |
| 99.80  | 34.2500  |
| 100.00 | 36.4300  |
| 99.64  | 39.4000  |
| 99.41  | 43.3900  |
| 99.42  | 48.6700  |
| 99.62  | 50.0400  |
| 99.67  | 55.8700  |
| 97.26  | 59.5100  |
| 99.93  | 73.4300  |
| 99.35  | 126.2700 |
| 100.00 | 186.3100 |
| 98.46  | 198.0400 |
| 99.99  | 241.3000 |
| 98.55  | 259.6200 |
| 99.69  | 268.4800 |
| 100.00 | 312.2200 |
| 100.00 | 335.7100 |
| 99.86  | 354.1000 |
| 99.90  | 357.6300 |
| 99.99  | 357.8500 |
| 99.97  | 428.4500 |
| 93.34  | 468.1000 |
| 61.24  | 482.9500 |
| 98.60  | 495.9100 |
| 95.17  | 501.6300 |
| 98.72  | 528.3000 |
| 0.00   | 540.3200 |
| 99.66  | 564.6800 |
| 98.91  | 570.6800 |
| 4.04   | 575.9800 |
| 93.59  | 589.2100 |
| 96.47  | 603.9500 |
| 99.93  | 628.9300 |
| 97.62  | 631.4700 |
| 99.84  | 647.3400 |
| 99.58  | 654.2700 |
| 62.06  | 661.4300 |
| 99.98  | 719.0400 |
| 40.16  | 762.1700 |
| 99.76  | 786.2300 |
| 80.68  | 808.4200 |
| 99.85  | 839.9600 |
| 99.98  | 848.3500 |
| 99.75  | 850.1700 |
| 96.92  | 869.8900 |
| 96.92  | 871.7600 |

|        |           |
|--------|-----------|
| 82.91  | 902.2900  |
| 99.99  | 941.2000  |
| 88.99  | 950.8000  |
| 99.95  | 974.0400  |
| 99.99  | 978.2900  |
| 99.71  | 980.6700  |
| 99.99  | 981.6700  |
| 99.88  | 1003.2200 |
| 97.99  | 1019.9600 |
| 99.85  | 1021.8700 |
| 58.56  | 1040.0500 |
| 39.13  | 1044.3900 |
| 99.98  | 1046.2700 |
| 99.83  | 1047.6000 |
| 52.46  | 1063.2700 |
| 20.85  | 1107.4600 |
| 98.74  | 1107.9900 |
| 67.81  | 1117.5800 |
| 55.78  | 1119.4100 |
| 84.92  | 1149.0300 |
| 95.58  | 1151.0300 |
| 92.31  | 1154.1800 |
| 99.01  | 1164.2000 |
| 93.78  | 1166.2200 |
| 99.85  | 1177.6800 |
| 27.39  | 1208.1600 |
| 99.69  | 1213.8000 |
| 92.41  | 1228.5500 |
| 99.59  | 1232.4100 |
| 92.44  | 1264.3600 |
| 99.98  | 1277.6300 |
| 99.12  | 1311.8600 |
| 99.98  | 1321.1100 |
| 74.00  | 1336.9400 |
| 100.00 | 1358.5800 |
| 91.24  | 1372.8800 |
| 100.00 | 1432.6200 |
| 62.65  | 1546.6400 |
| 93.97  | 1547.4400 |
| 91.64  | 1552.5200 |
| 87.21  | 1583.8700 |
| 77.80  | 1586.0900 |
| 88.69  | 1607.6700 |
| 100.00 | 1773.4600 |
| 99.08  | 1777.0400 |
| 98.83  | 1778.8400 |
| 99.89  | 1789.2400 |
| 99.71  | 1790.3000 |
| 100.00 | 1797.3300 |
| 88.78  | 2207.1700 |
| 94.68  | 2234.9000 |
| 98.96  | 3003.0800 |
| 99.33  | 3024.5500 |
| 98.70  | 3031.7700 |
| 99.33  | 3034.2300 |
| 99.76  | 3042.4600 |
| 97.88  | 3044.1600 |
| 98.96  | 3052.2100 |
| 99.05  | 3053.8900 |
| 99.65  | 3056.8400 |
| 98.67  | 3060.8700 |

|       |           |
|-------|-----------|
| 98.30 | 3061.7600 |
| 98.72 | 3070.1000 |
| 99.32 | 3075.7000 |
| 99.16 | 3084.2400 |
| 98.16 | 3340.3000 |
| 98.22 | 3373.1600 |



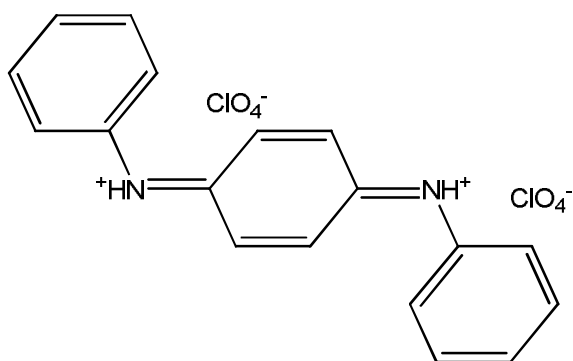

**EM = model unit of polyaniline, emeraldine form protonated**

----- GAMESS Interface -----

Model: emeraldine

GAMESS Job: Predict IR/Raman Spectrum DFT

IR Spectrum Species:

Transmittance (%)    Wavenumbers

|        |          |
|--------|----------|
| 100.00 | 2.5100   |
| 99.97  | 8.3200   |
| 99.98  | 10.1100  |
| 99.66  | 14.6400  |
| 99.94  | 16.3200  |
| 99.99  | 16.8900  |
| 97.77  | 20.5400  |
| 99.97  | 24.0700  |
| 99.66  | 28.6700  |
| 99.93  | 29.1100  |
| 97.83  | 37.2800  |
| 99.47  | 38.5400  |
| 99.79  | 51.3800  |
| 98.87  | 52.5200  |
| 99.98  | 68.4200  |
| 99.68  | 97.8100  |
| 100.00 | 100.0900 |
| 99.78  | 190.3200 |
| 99.94  | 194.9500 |
| 99.99  | 205.6100 |
| 95.68  | 212.7600 |
| 100.00 | 215.0800 |
| 98.05  | 329.8200 |
| 100.00 | 339.5400 |
| 99.82  | 353.0900 |
| 100.00 | 354.1400 |
| 96.61  | 363.4200 |
| 87.60  | 426.0100 |
| 99.93  | 427.4800 |
| 100.00 | 452.2500 |
| 0.00   | 463.5400 |
| 95.86  | 475.1000 |
| 100.00 | 512.6900 |
| 99.99  | 531.5400 |

|        |           |
|--------|-----------|
| 99.00  | 573.3100  |
| 11.95  | 590.2000  |
| 99.37  | 598.8900  |
| 99.94  | 604.4100  |
| 65.18  | 622.7700  |
| 99.97  | 627.2500  |
| 99.69  | 628.2300  |
| 99.91  | 635.6800  |
| 77.07  | 663.7400  |
| 100.00 | 700.5500  |
| 100.00 | 723.4100  |
| 38.04  | 768.4200  |
| 99.80  | 783.9100  |
| 100.00 | 799.6700  |
| 87.02  | 839.2200  |
| 100.00 | 845.3800  |
| 99.97  | 845.9000  |
| 51.61  | 886.0700  |
| 89.06  | 886.5600  |
| 97.25  | 899.2800  |
| 99.95  | 941.0100  |
| 90.21  | 943.5200  |
| 99.99  | 965.8500  |
| 100.00 | 976.5200  |
| 100.00 | 976.7300  |
| 99.26  | 994.9700  |
| 75.88  | 995.0600  |
| 95.78  | 1017.7400 |
| 98.95  | 1018.5000 |
| 100.00 | 1019.8800 |
| 31.56  | 1049.7800 |
| 95.70  | 1052.6900 |
| 59.95  | 1102.7600 |
| 55.03  | 1103.3300 |
| 33.49  | 1121.7500 |
| 99.64  | 1128.7400 |
| 99.54  | 1151.6300 |
| 98.50  | 1152.6700 |
| 88.54  | 1154.8800 |
| 99.22  | 1158.5600 |
| 94.65  | 1160.2300 |
| 99.96  | 1182.2300 |
| 98.82  | 1221.5700 |
| 98.98  | 1222.1800 |
| 99.93  | 1237.2700 |
| 99.95  | 1298.2700 |
| 99.97  | 1298.3600 |
| 56.62  | 1309.6900 |
| 99.96  | 1371.6400 |
| 32.69  | 1384.2900 |
| 93.89  | 1423.2700 |
| 99.99  | 1496.6000 |
| 91.76  | 1541.3600 |
| 71.43  | 1541.5700 |
| 97.81  | 1588.2200 |
| 68.81  | 1590.3400 |
| 98.53  | 1770.7300 |
| 98.05  | 1771.3300 |
| 99.99  | 1786.9800 |
| 99.93  | 1787.4500 |
| 99.99  | 1832.9100 |

|        |           |
|--------|-----------|
| 96.05  | 1839.7000 |
| 97.88  | 1856.9400 |
| 100.00 | 1865.8500 |
| 93.13  | 2266.7200 |
| 96.54  | 2302.4900 |
| 99.62  | 2980.3200 |
| 99.79  | 3008.7800 |
| 98.38  | 3025.6500 |
| 99.04  | 3031.4000 |
| 99.87  | 3041.1100 |
| 99.72  | 3043.2300 |
| 99.02  | 3052.1200 |
| 98.89  | 3055.3400 |
| 98.95  | 3060.6200 |
| 99.63  | 3063.5600 |
| 98.86  | 3068.2700 |
| 98.34  | 3070.6400 |
| 99.13  | 3082.1700 |
| 99.19  | 3083.2700 |

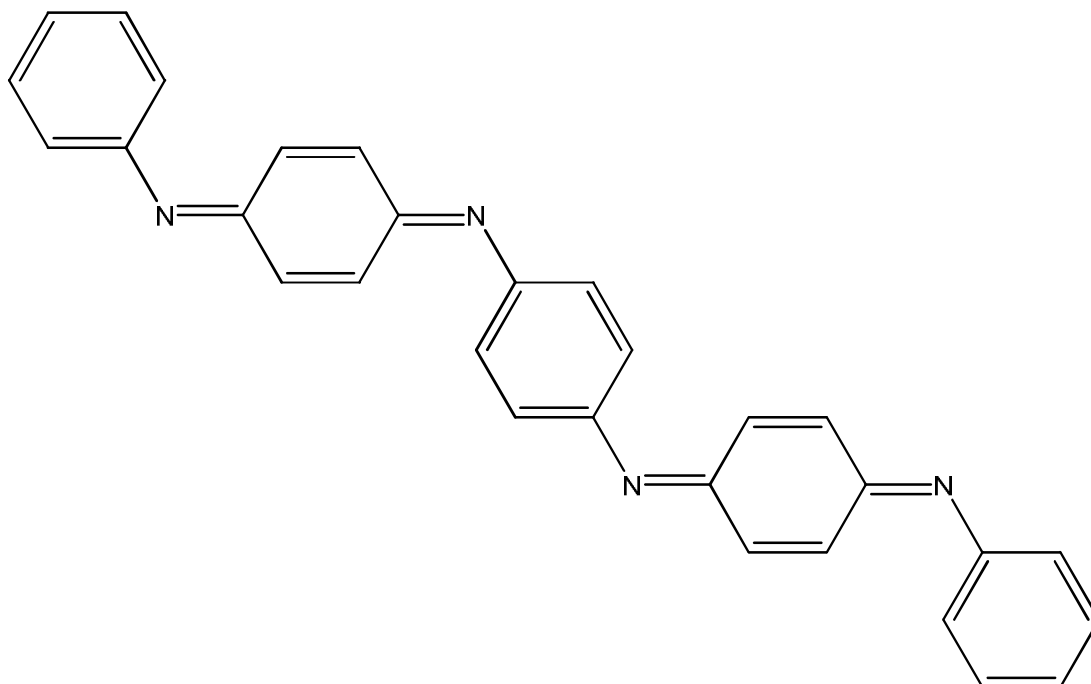

**PN = model unit of polyaniline, pernigraniline form**

GAMESS Job: Predict IR/Raman Spectrum B3LYP/6-31G

IR Spectrum Species:

| Transmittance (%) | Wavenumbers |
|-------------------|-------------|
| 100.00            | 3.2000      |
| 99.96             | 7.0400      |
| 100.00            | 8.5000      |
| 99.99             | 9.5600      |
| 100.00            | 9.7500      |
| 100.00            | 11.0900     |
| 99.99             | 13.0700     |
| 100.00            | 13.5800     |
| 99.99             | 14.0300     |
| 99.99             | 15.6100     |
| 99.84             | 16.1500     |
| 99.98             | 16.9700     |
| 100.00            | 18.2200     |
| 99.97             | 43.0000     |
| 99.82             | 48.8800     |
| 96.84             | 57.6400     |
| 100.00            | 70.9800     |
| 99.63             | 92.0800     |
| 98.00             | 92.8700     |
| 100.00            | 99.8000     |
| 99.54             | 140.7400    |
| 99.96             | 176.4800    |
| 99.56             | 198.4700    |
| 99.67             | 202.5400    |
| 100.00            | 218.0500    |
| 99.34             | 268.4200    |
| 99.95             | 269.8200    |
| 99.89             | 316.0600    |

|        |           |
|--------|-----------|
| 99.73  | 343.0100  |
| 100.00 | 350.7300  |
| 97.49  | 351.6000  |
| 100.00 | 353.9600  |
| 99.26  | 355.4800  |
| 100.00 | 366.4000  |
| 99.96  | 382.4600  |
| 95.83  | 416.3500  |
| 100.00 | 435.8600  |
| 99.04  | 451.5600  |
| 99.46  | 463.4500  |
| 99.60  | 476.6200  |
| 92.67  | 494.3700  |
| 100.00 | 497.1300  |
| 99.97  | 534.3900  |
| 93.49  | 549.3300  |
| 99.83  | 551.0000  |
| 100.00 | 562.3600  |
| 99.99  | 598.3000  |
| 99.92  | 599.7100  |
| 99.03  | 614.8300  |
| 99.79  | 616.9900  |
| 99.69  | 627.1400  |
| 99.65  | 628.1300  |
| 100.00 | 641.9000  |
| 67.99  | 648.8100  |
| 99.85  | 667.1100  |
| 88.33  | 677.6900  |
| 99.67  | 689.0400  |
| 99.97  | 712.5500  |
| 100.00 | 713.3200  |
| 44.90  | 768.3900  |
| 99.99  | 771.4100  |
| 100.00 | 791.4000  |
| 100.00 | 791.5500  |
| 99.84  | 797.8400  |
| 88.27  | 807.6100  |
| 99.96  | 837.9300  |
| 98.49  | 840.8200  |
| 99.98  | 845.4800  |
| 99.97  | 845.5000  |
| 84.86  | 864.4000  |
| 99.83  | 876.2200  |
| 0.00   | 876.8700  |
| 94.92  | 885.8000  |
| 71.37  | 897.2800  |
| 83.22  | 935.6500  |
| 99.43  | 937.6200  |
| 99.71  | 948.9400  |
| 99.86  | 957.0500  |
| 100.00 | 969.0700  |
| 99.99  | 975.1500  |
| 99.99  | 975.1600  |
| 99.97  | 987.9800  |
| 99.92  | 988.0300  |
| 78.51  | 989.4800  |
| 95.07  | 990.3000  |
| 79.90  | 995.4600  |
| 100.00 | 1011.4900 |
| 100.00 | 1011.6100 |
| 95.06  | 1013.8900 |

|        |           |
|--------|-----------|
| 98.75  | 1013.9300 |
| 93.69  | 1028.1900 |
| 49.18  | 1050.0400 |
| 57.65  | 1053.4600 |
| 65.36  | 1058.9700 |
| 55.87  | 1102.1100 |
| 54.86  | 1103.9000 |
| 67.32  | 1125.0500 |
| 66.74  | 1128.2500 |
| 71.61  | 1137.5800 |
| 68.84  | 1143.8400 |
| 76.48  | 1145.0600 |
| 99.22  | 1150.0300 |
| 99.52  | 1154.8000 |
| 98.86  | 1159.8400 |
| 99.71  | 1160.5700 |
| 99.70  | 1165.8900 |
| 99.96  | 1175.9100 |
| 99.65  | 1177.1000 |
| 99.87  | 1220.2800 |
| 98.73  | 1222.4700 |
| 99.57  | 1224.9700 |
| 99.99  | 1228.5000 |
| 99.97  | 1228.7800 |
| 94.04  | 1259.0100 |
| 99.95  | 1301.7400 |
| 99.95  | 1301.9000 |
| 99.94  | 1303.1700 |
| 22.70  | 1312.3800 |
| 57.32  | 1326.2700 |
| 86.49  | 1381.5800 |
| 37.52  | 1383.2000 |
| 96.13  | 1422.4000 |
| 92.69  | 1422.5200 |
| 91.16  | 1462.2500 |
| 99.99  | 1506.4000 |
| 99.93  | 1506.9300 |
| 93.30  | 1537.6300 |
| 81.39  | 1540.9500 |
| 80.62  | 1541.2800 |
| 78.69  | 1591.7600 |
| 80.06  | 1595.6300 |
| 82.19  | 1619.3900 |
| 100.00 | 1758.8200 |
| 95.06  | 1771.8300 |
| 99.76  | 1789.5300 |
| 99.76  | 1789.9900 |
| 99.34  | 1794.3800 |
| 99.71  | 1839.3800 |
| 99.90  | 1839.7500 |
| 96.10  | 1847.7600 |
| 96.22  | 1848.0300 |
| 98.83  | 1866.4700 |
| 96.97  | 1868.0800 |
| 99.94  | 1871.9300 |
| 99.97  | 1872.1500 |
| 99.60  | 3013.1300 |
| 99.34  | 3014.0500 |
| 99.58  | 3025.7800 |
| 98.57  | 3033.8000 |
| 99.91  | 3040.3300 |

|       |           |
|-------|-----------|
| 99.48 | 3041.4700 |
| 99.60 | 3043.8500 |
| 99.60 | 3044.1100 |
| 98.88 | 3049.3900 |
| 98.71 | 3055.7800 |
| 97.93 | 3056.4800 |
| 98.22 | 3058.6400 |
| 99.75 | 3058.8300 |
| 98.46 | 3059.2000 |
| 98.72 | 3063.6400 |
| 99.78 | 3063.6800 |
| 98.70 | 3066.0400 |
| 99.56 | 3066.2700 |
| 98.48 | 3076.0100 |
| 99.16 | 3080.2500 |
| 98.28 | 3080.8800 |
| 99.18 | 3093.7900 |

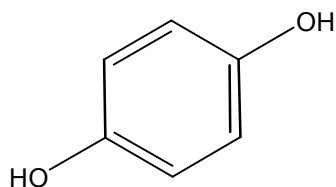

**HQ = Hydroquinone**

GAMESS Job: Predict IR/Raman Spectrum B3LYP/6-31G

IR Spectrum Species:

| Transmittance (%) | Wavenumbers |
|-------------------|-------------|
| 100.00            | 2.9700      |
| 100.00            | 11.4200     |
| 100.00            | 14.0300     |
| 97.83             | 55.5200     |
| 93.59             | 68.9800     |
| 99.59             | 77.9500     |
| 100.00            | 83.0500     |
| 99.99             | 265.7400    |
| 0.00              | 298.0400    |
| 99.93             | 313.2800    |
| 100.00            | 356.2100    |
| 89.20             | 425.3300    |
| 100.00            | 433.3500    |
| 99.90             | 475.4100    |
| 98.35             | 519.2900    |
| 98.62             | 667.3500    |
| 100.00            | 713.9300    |
| 87.51             | 792.6800    |
| 84.56             | 805.4100    |
| 84.52             | 868.6400    |
| 99.85             | 889.4200    |
| 100.00            | 914.1400    |
| 100.00            | 990.9900    |
| 99.95             | 1042.1000   |
| 97.07             | 1141.6300   |
| 34.59             | 1220.1700   |
| 36.28             | 1225.6300   |
| 98.31             | 1237.8700   |
| 70.29             | 1349.4700   |
| 98.92             | 1376.3200   |
| 74.28             | 1393.1900   |
| 97.06             | 1426.8000   |
| 99.43             | 1518.8600   |
| 27.74             | 1596.8300   |
| 99.88             | 1696.8800   |
| 99.96             | 1702.6900   |
| 97.85             | 3190.4600   |
| 92.73             | 3206.2000   |
| 98.15             | 3208.9400   |
| 95.84             | 3226.8800   |
| 92.94             | 3760.0500   |
| 93.42             | 3761.3100   |



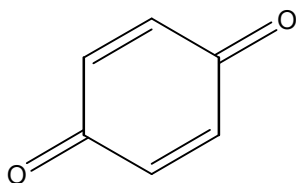

**BQ = benzoquinone**

GAMESS Job: Predict IR/Raman Spectrum B3LYP/6-31G

IR Spectrum Species:

Transmittance (%)    Wavenumbers

| -----  | -----     |
|--------|-----------|
| 99.37  | 9.5200    |
| 98.28  | 10.5600   |
| 99.14  | 13.2900   |
| 99.99  | 170.9400  |
| 100.00 | 178.1700  |
| 99.99  | 189.6800  |
| 99.98  | 259.9900  |
| 80.42  | 279.0200  |
| 47.02  | 404.6500  |
| 80.27  | 405.3200  |
| 100.00 | 463.5000  |
| 100.00 | 478.1700  |
| 100.00 | 507.2300  |
| 100.00 | 557.2400  |
| 99.83  | 579.3900  |
| 81.85  | 636.2400  |
| 99.87  | 676.4000  |
| 88.41  | 749.9100  |
| 99.97  | 790.6700  |
| 100.00 | 834.1700  |
| 98.33  | 875.5500  |
| 0.00   | 902.1000  |
| 99.70  | 932.8400  |
| 96.83  | 957.2200  |
| 100.00 | 988.2800  |
| 99.92  | 990.6300  |
| 26.69  | 1055.2800 |
| 99.99  | 1138.9100 |
| 98.36  | 1263.8200 |
| 99.93  | 1276.4400 |
| 99.99  | 1304.5900 |
| 71.35  | 1337.2800 |
| 45.32  | 1654.3200 |
| 99.44  | 3086.6600 |
| 99.74  | 3097.7100 |
| 99.29  | 3112.1200 |
| 99.87  | 3122.8100 |

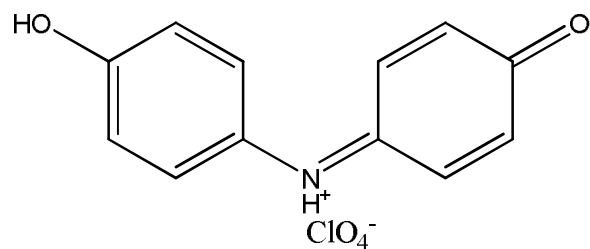

**IN = indophenol**

GAMESS Job: Predict IR/Raman Spectrum B3LYP/6-31G

IR Spectrum Species:

Transmittance (%)    Wavenumbers

|       |          |
|-------|----------|
| 99.97 | 4.6500   |
| 99.98 | 5.5900   |
| 99.95 | 7.6200   |
| 99.72 | 11.1600  |
| 99.98 | 11.6800  |
| 99.93 | 13.3700  |
| 97.25 | 18.2700  |
| 99.09 | 37.1200  |
| 99.80 | 69.7200  |
| 97.72 | 83.2000  |
| 99.82 | 84.3900  |
| 99.45 | 134.6200 |
| 68.57 | 141.9900 |
| 98.64 | 164.8700 |
| 99.97 | 235.4200 |
| 99.47 | 246.3000 |
| 99.89 | 283.4200 |
| 92.19 | 300.2700 |
| 48.13 | 307.9700 |
| 99.99 | 342.4000 |
| 94.39 | 356.0000 |
| 99.89 | 384.7200 |
| 93.94 | 441.8400 |
| 97.57 | 480.6400 |
| 56.65 | 484.4400 |
| 80.71 | 500.6400 |
| 96.71 | 503.2400 |
| 99.22 | 555.6400 |
| 99.95 | 609.1700 |
| 99.65 | 629.2600 |
| 99.12 | 649.6500 |
| 99.08 | 676.6100 |
| 98.74 | 724.9500 |
| 98.91 | 771.2600 |
| 96.55 | 824.4000 |
| 96.63 | 828.9100 |
| 97.01 | 833.6200 |
| 98.24 | 877.5700 |
| 0.00  | 885.7000 |
| 99.96 | 929.3700 |
| 98.98 | 957.7000 |
| 78.10 | 968.3300 |
| 99.31 | 984.7100 |
| 98.32 | 999.1400 |

|       |           |
|-------|-----------|
| 97.74 | 1019.4900 |
| 92.27 | 1024.9000 |
| 55.22 | 1052.8500 |
| 89.59 | 1125.9800 |
| 70.99 | 1142.1300 |
| 97.00 | 1159.6000 |
| 95.82 | 1193.1100 |
| 98.95 | 1204.5000 |
| 98.99 | 1246.2100 |
| 77.78 | 1272.4200 |
| 13.27 | 1314.7100 |
| 94.81 | 1361.5400 |
| 66.84 | 1391.0900 |
| 90.33 | 1440.5000 |
| 95.79 | 1455.9600 |
| 86.64 | 1502.5900 |
| 85.51 | 1562.7500 |
| 90.99 | 1629.4900 |
| 95.22 | 1764.4500 |
| 97.15 | 1782.0200 |
| 99.36 | 1826.0000 |
| 95.53 | 1854.1900 |
| 99.68 | 1866.1600 |
| 92.83 | 1966.9200 |
| 96.56 | 2189.8900 |
| 95.43 | 2618.2500 |
| 98.76 | 2795.4300 |
| 99.66 | 3004.3800 |
| 99.51 | 3007.2300 |
| 99.80 | 3032.3500 |
| 97.18 | 3040.5200 |
| 99.78 | 3049.3500 |
| 98.83 | 3052.2800 |
| 98.08 | 3069.7300 |
| 99.68 | 3117.4800 |
| 94.62 | 3858.0500 |

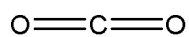

## Carbon dioxide

GAMESS Job: Predict IR/Raman Spectrum B3LYP/6-31G

IR Spectrum Species:

| Transmittance (%) | Wavenumbers |
|-------------------|-------------|
| 100.00            | 0.0400      |
| 100.00            | 0.8500      |
| 100.00            | 19.8100     |
| 100.00            | 102.6100    |
| 100.00            | 102.6400    |
| 94.66             | 541.0200    |
| 94.66             | 542.4100    |
| 100.00            | 1314.9600   |
| 0.00              | 2345.4100   |
